# Supplementary material for: Inhibition of apoptosis and biofilm formation in Candida auris by click-synthesized triazole-bridged quinoline derivatives
Source: Royal Society of Chemistry journal article supplement (doi:10.1039/d4ra03728f), 2024-01-01
Supplement: d4ra03728f1.pdf [file d4ra03728f1.pdf]

## **Supporting Information**

### **Inhibition of apoptosis and biofilm formation in *Candida auris* by click-synthesized triazole-bridged quinoline derivatives**

**Mohammad Younus Wani<sup>a\*</sup>, Vartika Srivastava<sup>b</sup>, Waleed Ahmed El-Said<sup>a</sup>, Abdullah Saad Al-Bogami<sup>a</sup>, Aijaz Ahmad<sup>b,c</sup>**

*<sup>a</sup>Department of Chemistry, College of Science, University of Jeddah, 21589 Jeddah, Saudi Arabia*

*<sup>b</sup>Department of Clinical Microbiology and Infectious Diseases, School of Pathology, Faculty of Health Sciences, University of the Witwatersrand, South Africa*

*<sup>c</sup>Division of Pulmonary, Allergy, Critical Care, and Sleep Medicine, Department of Medicine, University of Pittsburgh Medical Center; Pittsburgh, PA 15213, USA*

Corresponding author: [mwani@uj.edu.sa](mailto:mwani@uj.edu.sa) (MYW)

#### **Table of contents:**

Table S1: ADMET [Absorption, distribution, metabolism, excretion, and toxicity] Parameters of the compounds

Figure S1. <sup>1</sup>HNMR of the lead molecule QT7

Figure S2. <sup>13</sup>CNMR of the lead molecule QT7.

Figure S3. Mass spectrum of the lead molecule QT7.

**Table S1: ADMET [Absorption, distribution, metabolism, excretion, and toxicity]****Parameters of the compounds**

| <b>ADMET Parameters</b>                          | <b>QT1</b> | <b>QT2</b> | <b>QT3</b> | <b>QT4</b> | <b>QT5</b> | <b>QT6</b> | <b>QT7</b> | <b>QT8</b> | <b>QT9</b> | <b>QT10</b> | <b>FLZ*</b> |
|--------------------------------------------------|------------|------------|------------|------------|------------|------------|------------|------------|------------|-------------|-------------|
| <b>Water Solubility</b>                          | -3.73      | -3.79      | -3.92      | -3.97      | -3.92      | -4.09      | -4.09      | -4.13      | -3.86      | -4.16       | -2.41       |
| <b>Caco-2 Permeability</b>                       | 1.02       | 1.23       | 1.22       | 1.22       | 1.22       | -0.14      | -0.13      | 1.27       | 1.19       | 1.22        | 1.04        |
| <b>Intestinal Absorption</b>                     | 96.50      | 96.84      | 95.39      | 95.32      | 95.39      | 93.79      | 93.79      | 94.23      | 97.23      | 93.73       | 78.38       |
| <b>Skin Permeability</b>                         | -2.75      | -2.74      | -2.74      | -2.74      | -2.74      | -2.73      | -2.73      | -2.75      | -2.74      | -2.74       | -2.76       |
| <b>BBB permeability</b>                          | 0.67       | -0.87      | -1.04      | -1.07      | -1.04      | -1.16      | -1.16      | -1.31      | -1.09      | -1.21       | -1.31       |
| <b>CNS permeability</b>                          | -2.46      | -2.74      | -2.43      | -2.41      | -2.43      | -2.67      | -2.67      | -2.39      | -3.39      | -2.31       | -3.18       |
| <b>CYP2D6 substrate</b>                          | No          | No          |
| <b>CYP2C9 inhibitor</b>                          | No         | No         | No         | No         | No         | Yes        | Yes        | Yes        | Yes        | No          | No          |
| <b>CYP2D6 inhibitor</b>                          | No          | No          |
| <b>Total Clearance</b>                           | 0.17       | 0.26       | 0.06       | 0.08       | 0.06       | 0.18       | 0.19       | 0.15       | 0.29       | 0.11        | 0.34        |
| <b>Oral Rat Acute Toxicity (LD<sub>50</sub>)</b> | 2.67       | 2.46       | 2.47       | 2.48       | 2.67       | 3.06       | 3.06       | 2.55       | 2.50       | 2.67        | 2.20        |
| <b>Oral Rat Chronic Toxicity (LOAEL)</b>         | 1.08       | 1.38       | 1.15       | 1.14       | 1.08       | 0.86       | 0.83       | 0.87       | 1.17       | 1.08        | 0.92        |
| <b>Max. tolerated dose (human)</b>               | 0.15       | 0.31       | 0.34       | 0.34       | 0.34       | 0.06       | 0.06       | 0.34       | 0.48       | 0.36        | 0.12        |
| <b>AMES toxicity</b>                             | No          | No          |

\*FLZ: Fluconazole was the standard drug used in the studies.

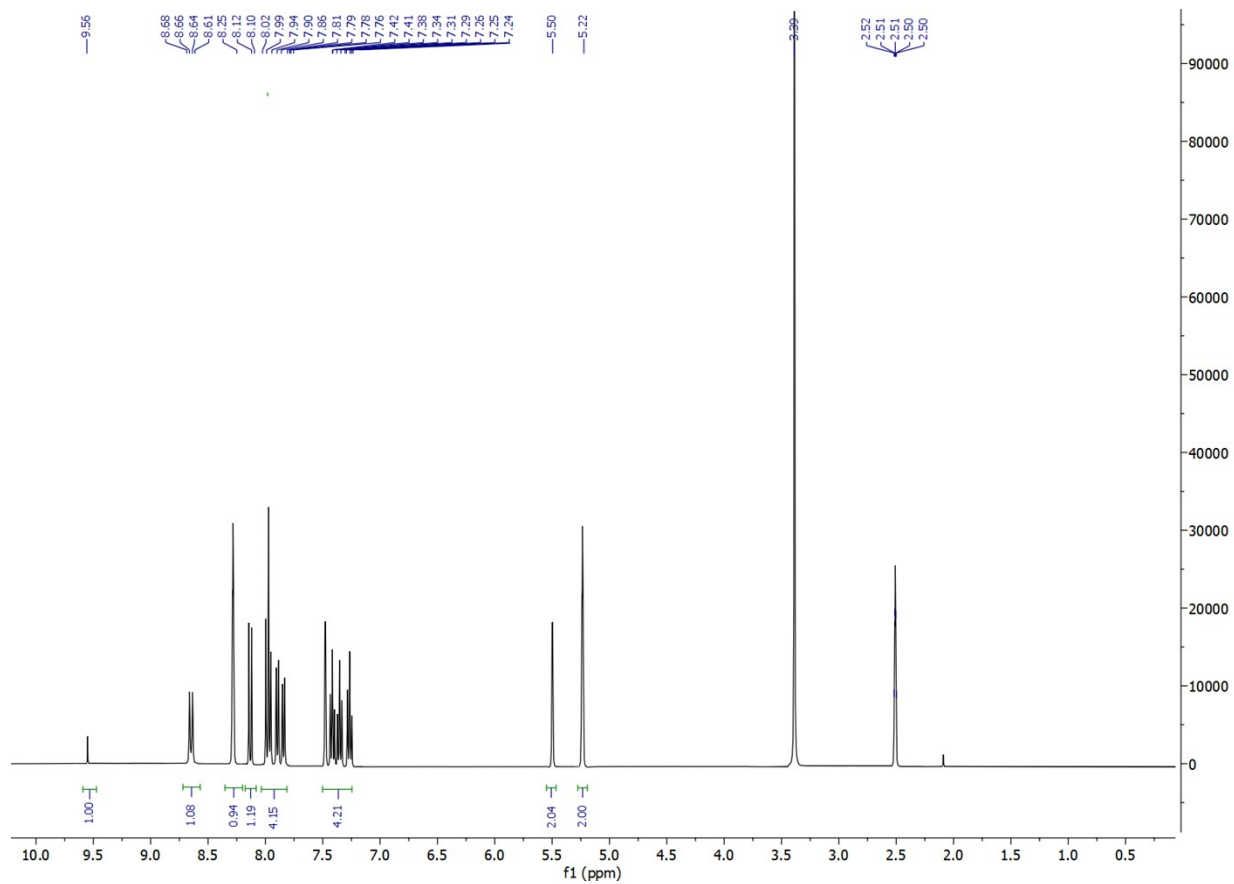

**Figure S1.**  $^1\text{H}$ NMR of the lead molecule QT7.

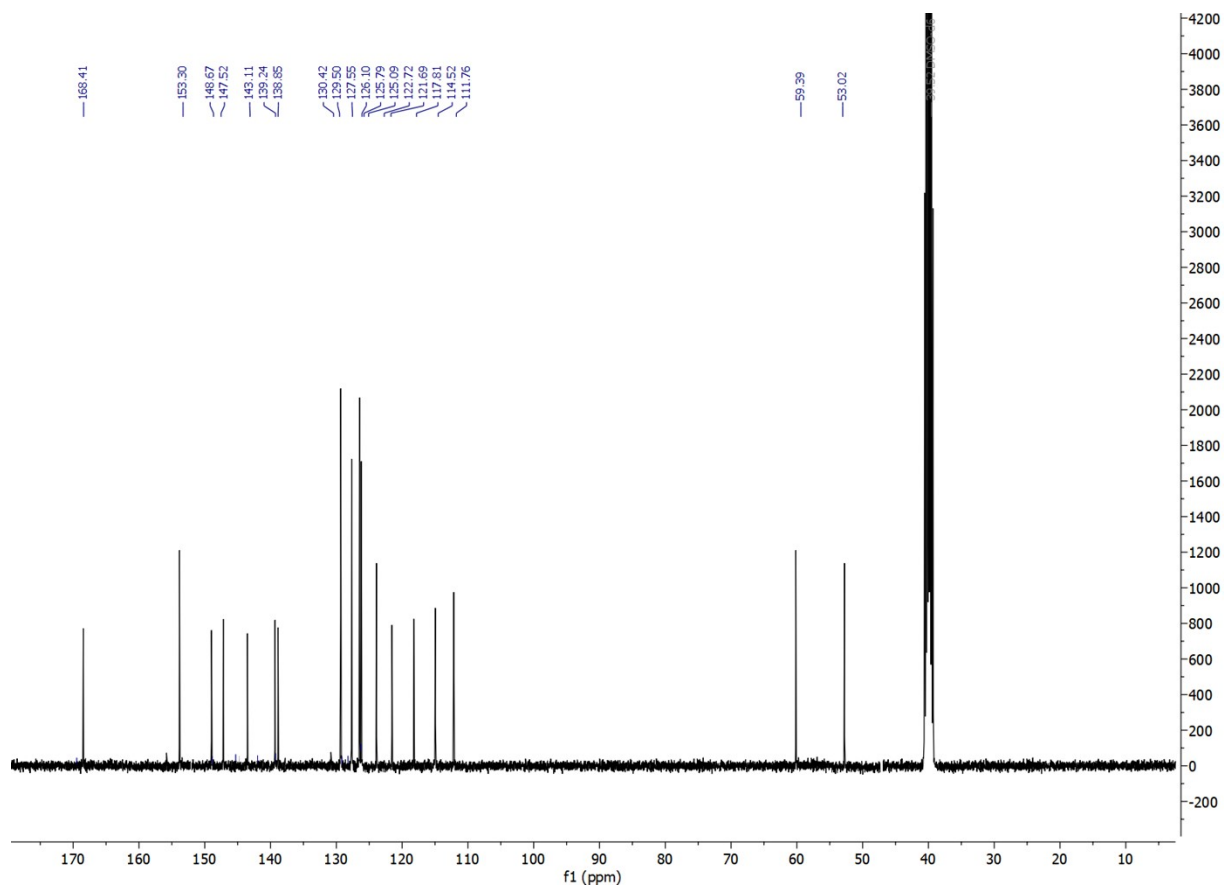

Figure S2.  $^{13}\text{C}$ NMR of the lead molecule QT7.

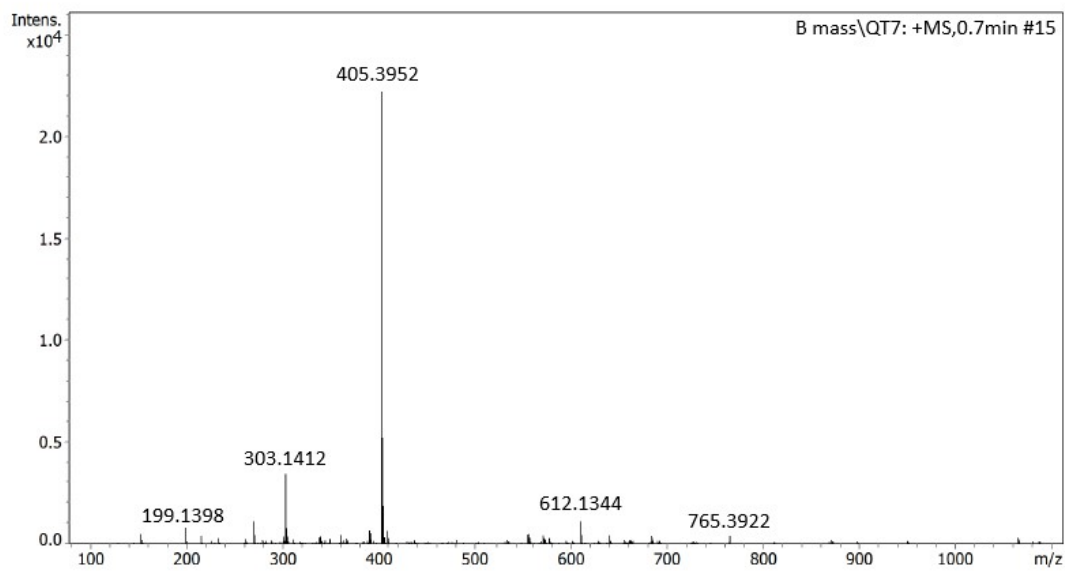

**Figure S3.** Mass spectrum of the lead molecule QT7.
